# Supplementary material for: Hydrogel nanocarrier encapsulated recombinant IκBα as a novel anticancer protein therapeutics
Source: Royal Society of Chemistry journal article supplement (doi:10.1039/c3ra23181j), 2013-01-01
Supplement: c3ra23181j.pdf [file c3ra23181j.pdf]

## Electronic Supplementary Information

# Hydrogel nanocarrier encapsulated recombinant IκBα as a novel anticancer protein therapeutics

Subhamoy Banerjee<sup>a</sup>, Amaresh Kumar Sahoo<sup>b</sup>, Arun Chattopadhyay<sup>b,c</sup>, Siddhartha Sankar Ghosh<sup>a,b,\*</sup>

Received (in XXX, XXX) Xth XXXXXXXXXX 20XX, Accepted Xth XXXXXXXXXX 20XX

DOI: 10.1039/b000000x

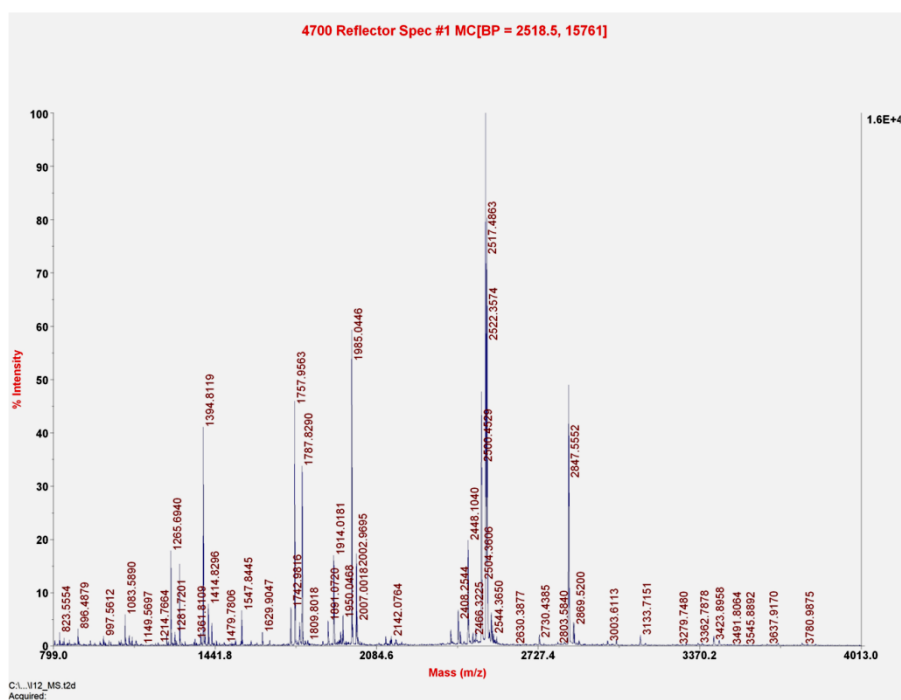

**Fig. S1** Trypsin digestion profile of GST-IκBα by MALDI-TOF experiment. 10% sequencematch was found by comparing with the MASCOT database.

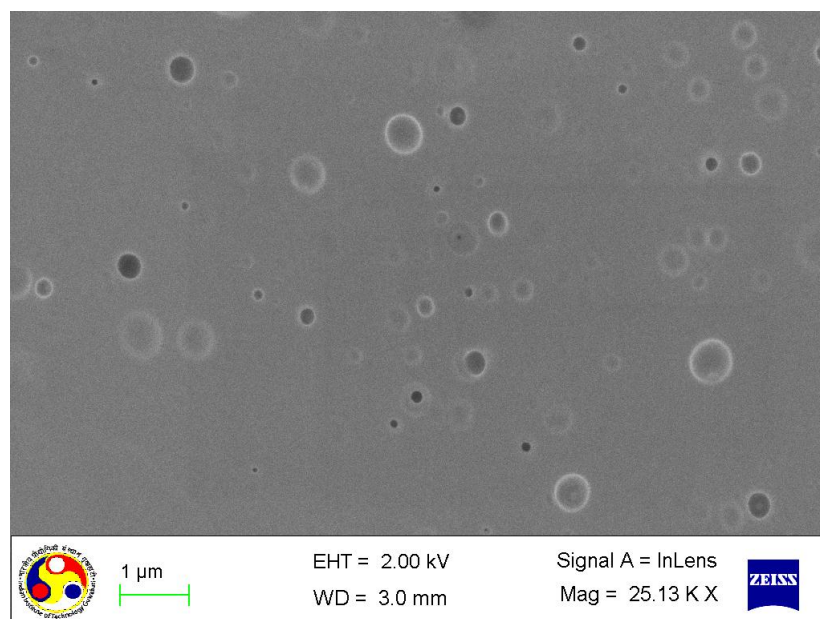

**Fig. S2** FESEM image of GST-I $\kappa$ B $\alpha$  loaded hydrogel nanoparticles.

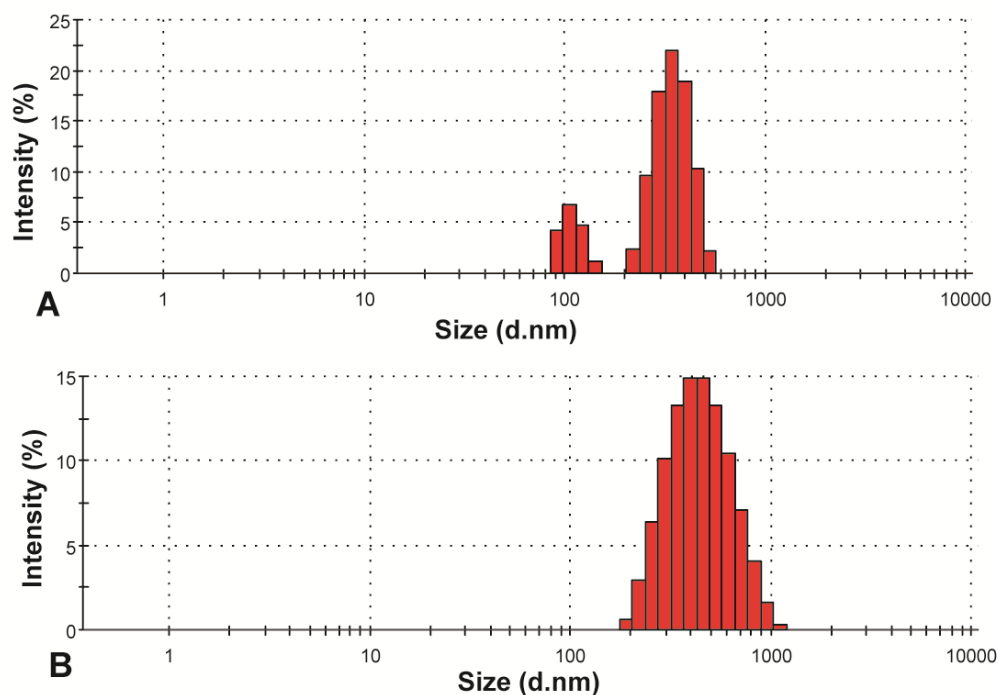

**Fig. S3** Dynamic light scattering data for (A) blank hydrogel Nanoparticle (average diameter 420 nm) and (B) protein loaded hydrogel nanoparticle (average diameter 421 nm).

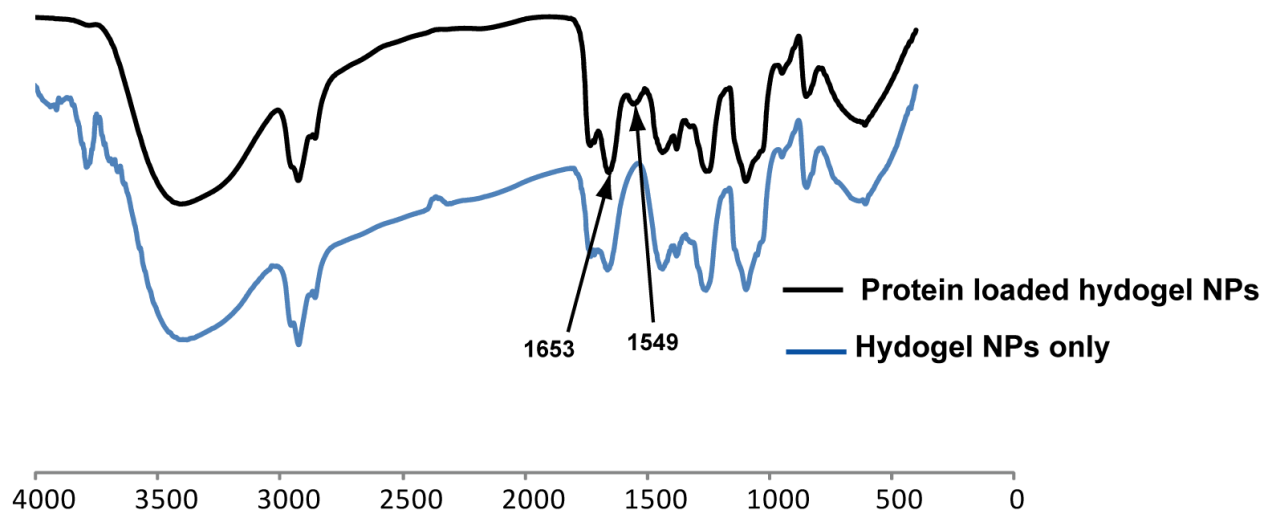

**Fig. S4** FTIR spectra of (A) protein loaded PVA/PVP hydrogel and (B) only PVA/PVP hydrogel.

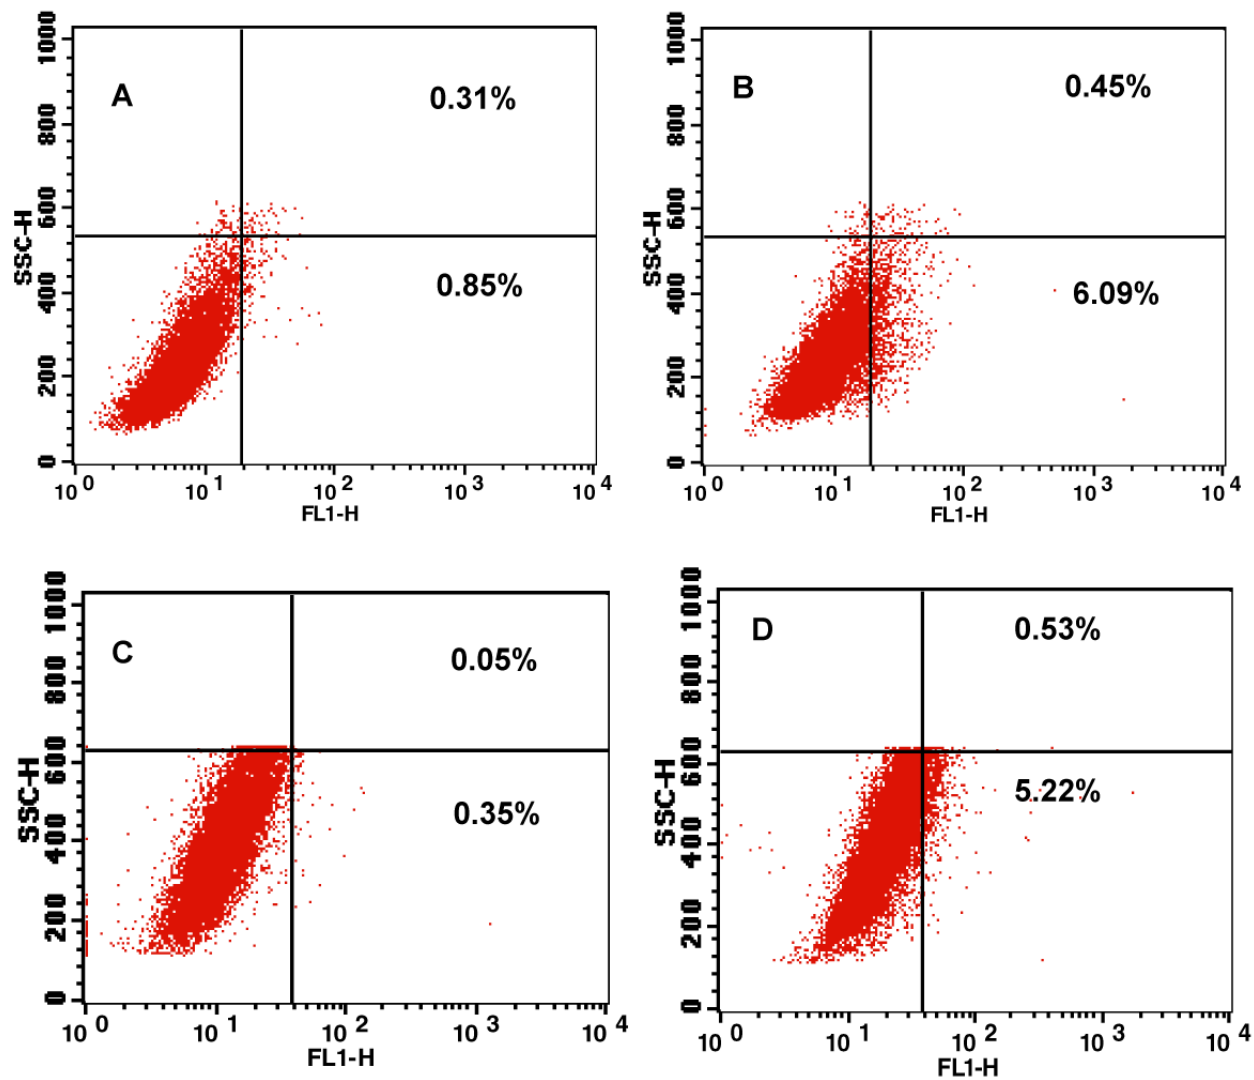

**Fig. S5** Dot plot analysis of FITC-Dextran encapsulated hydrogel delivery to (B) HeLa cells and (D) U87MG cells, whereas (A) untreated HeLa and (C) untreated U87MG.

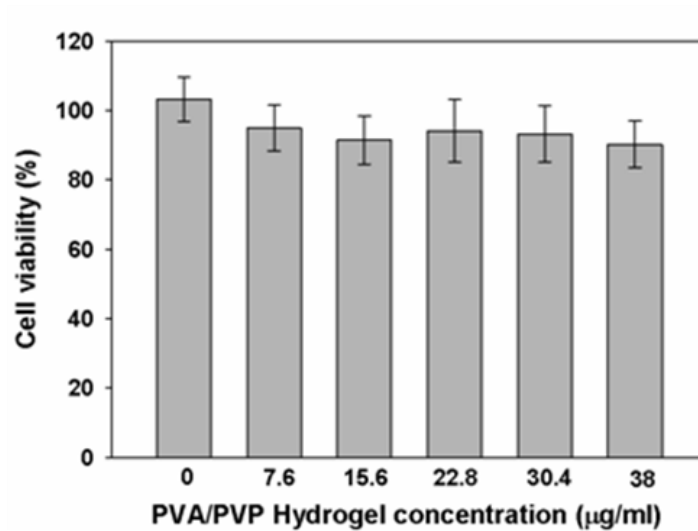

**Fig. S6** Cell viability assay of HeLa cells treated with different concentrations of blank hydrogel. All data are represented as mean  $\pm$  SD of three individual experiments.

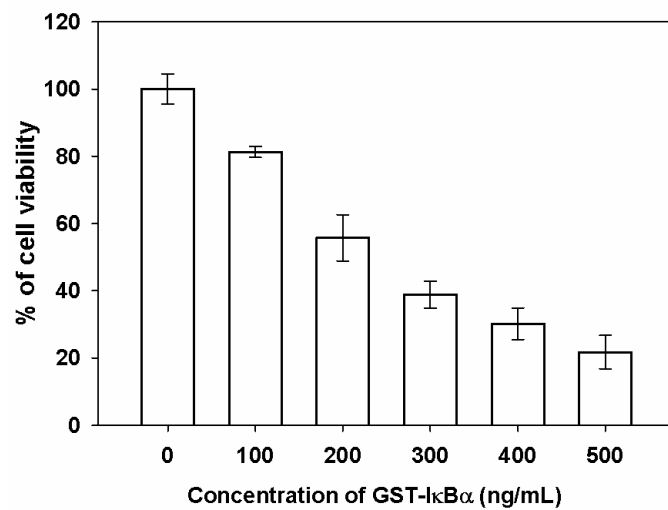

**Fig.S7** Cell viability assay of normal cell line (HEK cells) treated with different concentrations of hydrogel encapsulated GST-IκBα. All data are represented as mean  $\pm$  SD of three individual experiments.

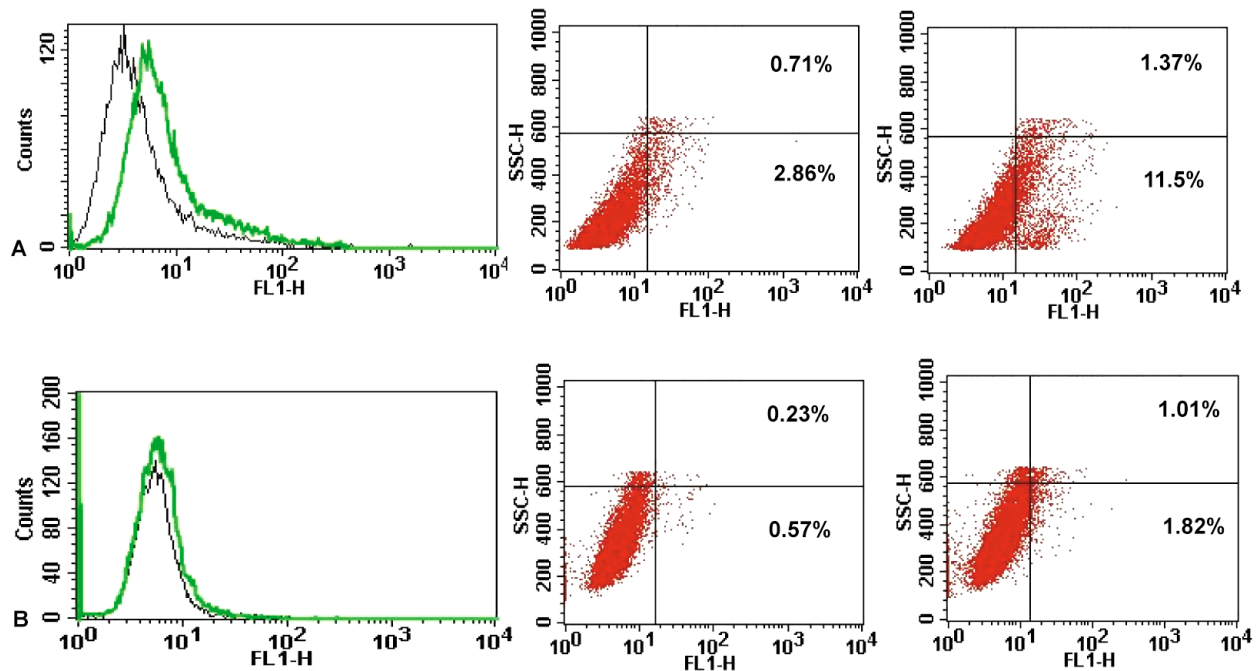

**Fig. S8** Uptake of FITC-Dextran encapsulated hydrogel by HeLa cells (A) in 1 h and (B) 6 h.
